# Supplementary material for: Excellent catalytic activity of magnetically recoverable Fe3O4–graphene oxide nanocomposites prepared by a simple method
Source: Royal Society of Chemistry journal article supplement (doi:10.1039/c5dt01260k), 2015-01-01
Supplement: c5dt01260k1.pdf [file c5dt01260k1.pdf]

### Supplementary Information

## Excellent catalytic activity of magnetically recoverable Fe<sub>3</sub>O<sub>4</sub>-graphene oxide nanocomposites prepared by a simple method

Prasenjit Mandal and Asoke P. Chattopadhyay\*  
*Department of Chemistry, University of Kalyani, Kalyani 741235, India*

Table S1. Dependence of yield on time and temperature of an A<sup>3</sup> coupling reaction

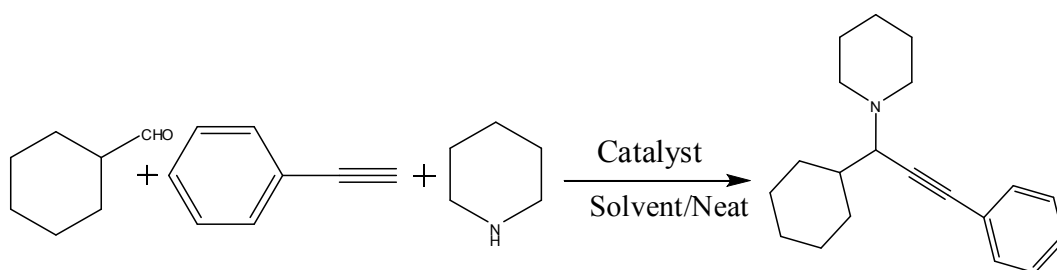

| Entry | Temperature (°C)    | Time (h) | Conversion (%) |
|-------|---------------------|----------|----------------|
| 1     | 80                  | 6        | 52             |
| 2     | 90                  | 6        | 58             |
| 3     | 80                  | 16       | 74             |
| 4     | 60                  | 16       | 68             |
| 5     | 90                  | 16       | 84             |
| 6     | 120                 | 16       | 93             |
| 7     | Room<br>Temperature | 16       | 26             |

**Conditions:** aldehyde (1 equiv), amine (1.2 equiv), alkyne (1.5 equiv), GO-Fe<sub>3</sub>O<sub>4</sub> (50 mg, 0.3 mol% Fe<sub>3</sub>O<sub>4</sub> np) in 5 mL solvent or neat for 11 h, temperature above 90 °C.

Table S2. Size screening of GO-Fe<sub>3</sub>O<sub>4</sub> nanocomposite on A<sup>3</sup> coupling of cyclohexanecarbaldehyde, phenylacetylene, and piperidine.

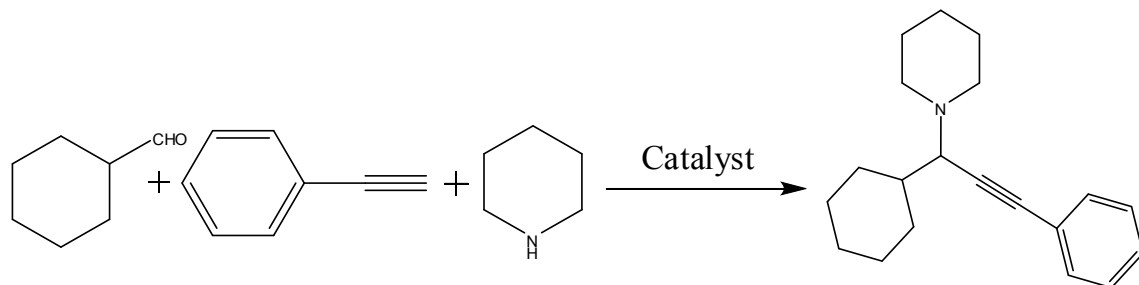

| Entry | Particle size (nm) | Time (h) | Conversion (%) | Yield (%) |
|-------|--------------------|----------|----------------|-----------|
| 1     | 15                 | 24       | 94             | 87        |
| 2     | 25                 | 24       | 97             | 93        |
| 3     | 35                 | 24       | 87             | 85        |
| 4     | 55                 | 24       | 91             | 78        |
| 5     | 80                 | 24       | 78             | 67        |

**Conditions:** aldehyde (1 equiv), amine (1.2 equiv), alkyne (1.5 equiv), GO-Fe<sub>3</sub>O<sub>4</sub> (50 mg, 0.3 mol% Fe<sub>3</sub>O<sub>4</sub> np) in 5 mL solvent or neat for 11 h, temperature above 90 °C.

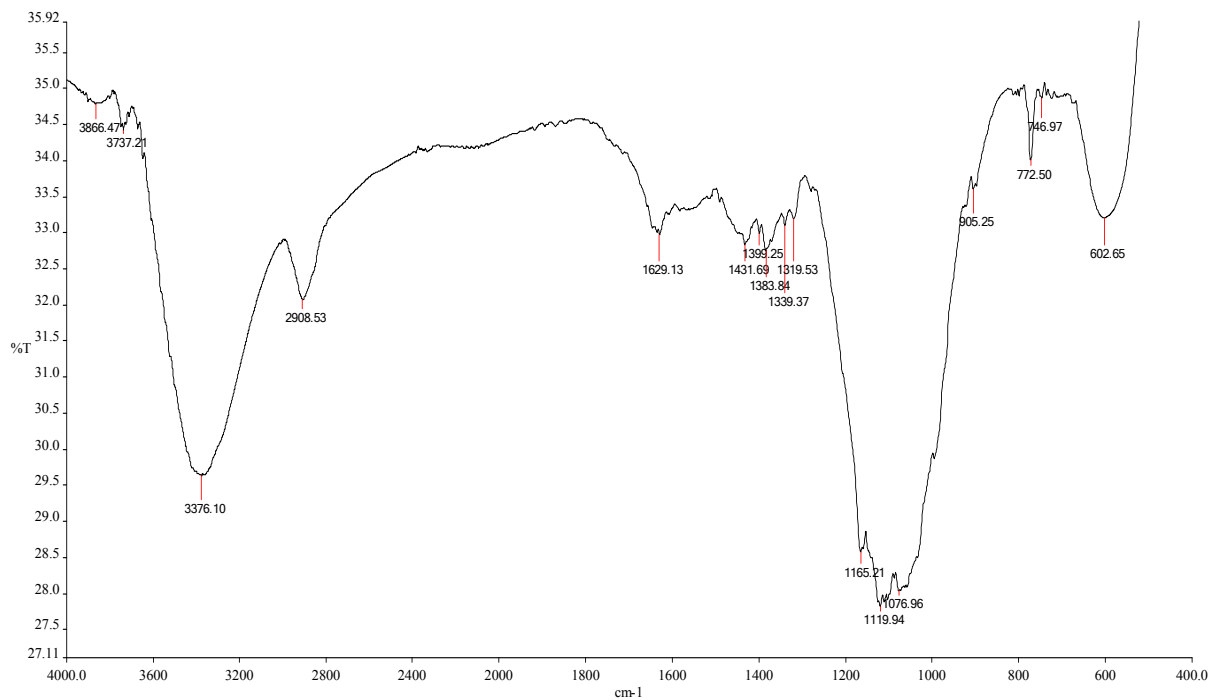

Fig. S1. FTIR spectrum of  $\text{Fe}_3\text{O}_4$ -GO nanocomposites after recycling 12 times

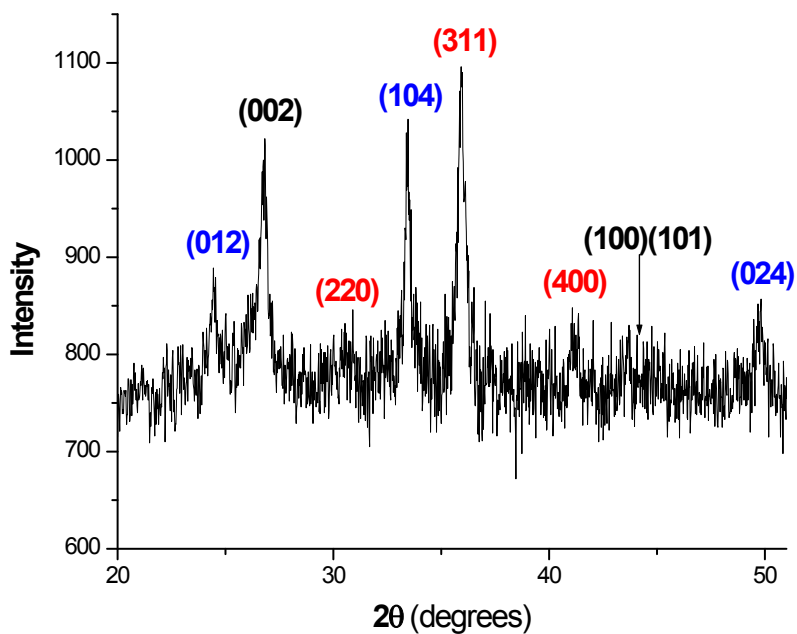

Fig. S2. XRD spectrum of  $\text{Fe}_3\text{O}_4$ -GO nanocomposites after recycling 12 times. GO peaks are denoted in black,  $\text{Fe}_3\text{O}_4$  peaks are in red and  $\text{Fe}_2\text{O}_3$  peaks are in blue.

2a

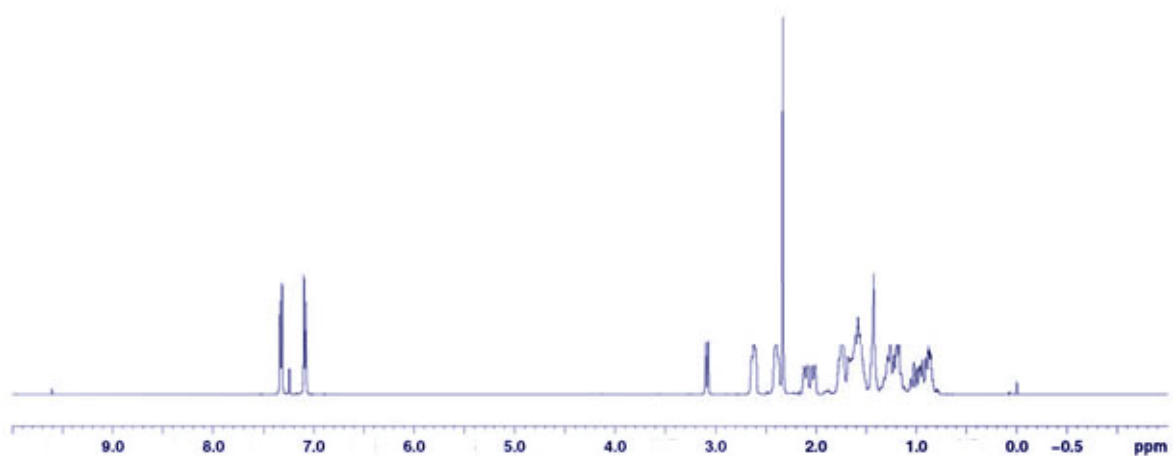

Fig. S3. <sup>1</sup>H NMR of 1-[1-Cyclohexyl-3-(4-methylphenyl)-2-propynyl]piperidine (2a)

3a

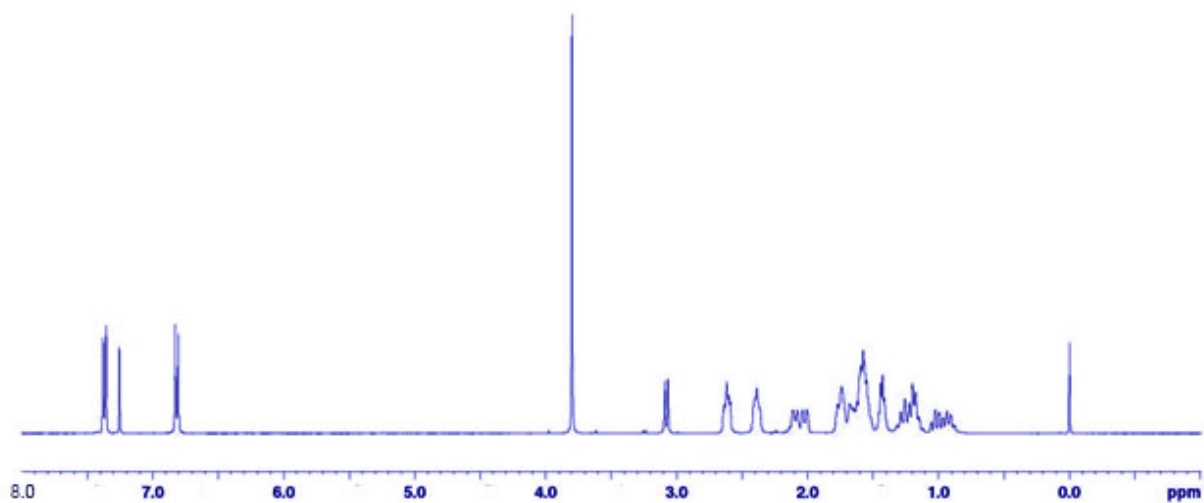

Fig. S4. <sup>1</sup>H NMR of 1-(1-cyclohexyl-3-(4-methoxyphenyl)prop-2-ynyl)piperidine (3a)

4a

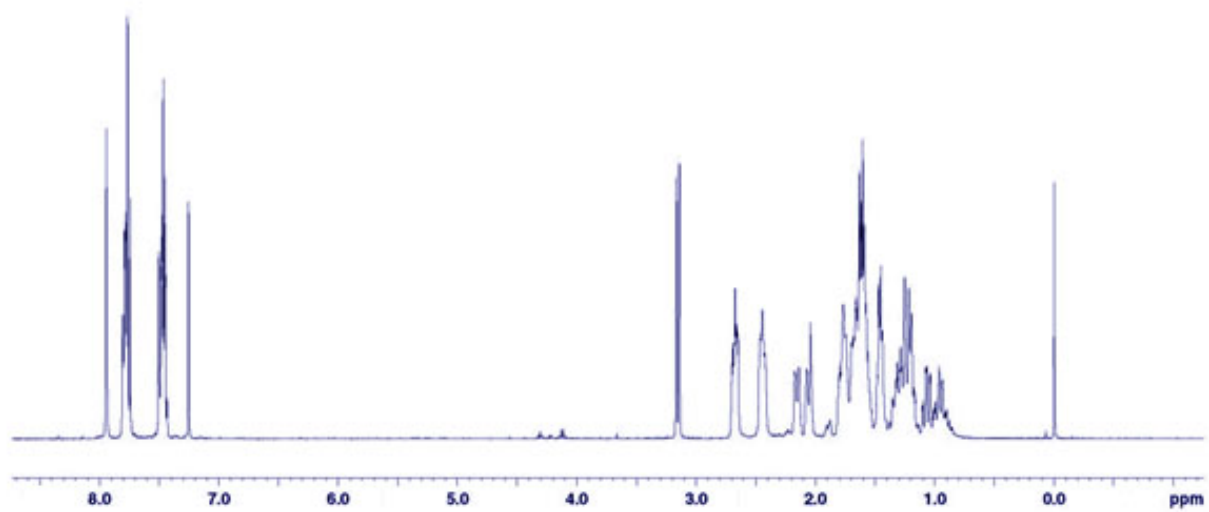

Fig. S5. <sup>1</sup>H NMR of 1-[1-Cyclohexyl-3-(1-naphthyl)-2-propynyl]piperidine (4a)

5a

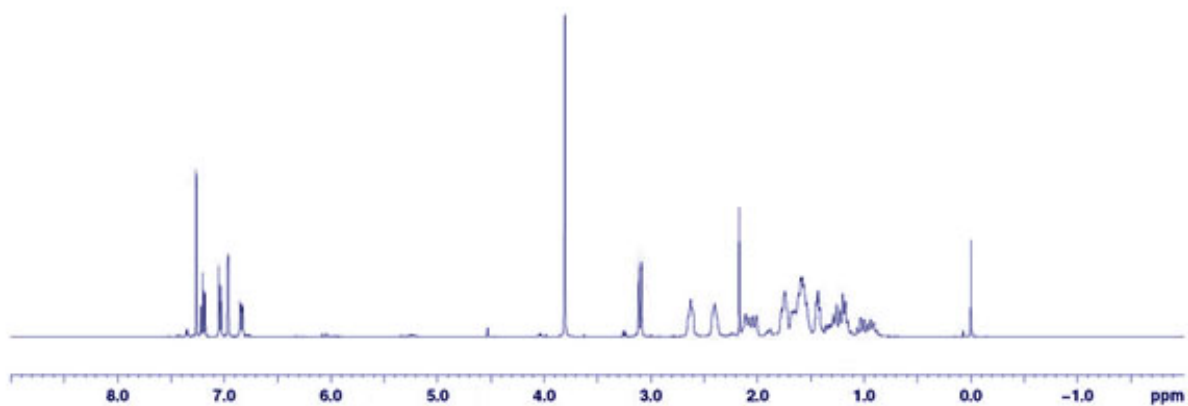

Fig. S6. <sup>1</sup>H NMR of 1-(1-cyclohexyl-3-(3-methoxyphenyl)prop-2-ynyl)piperidine (5a)

6a

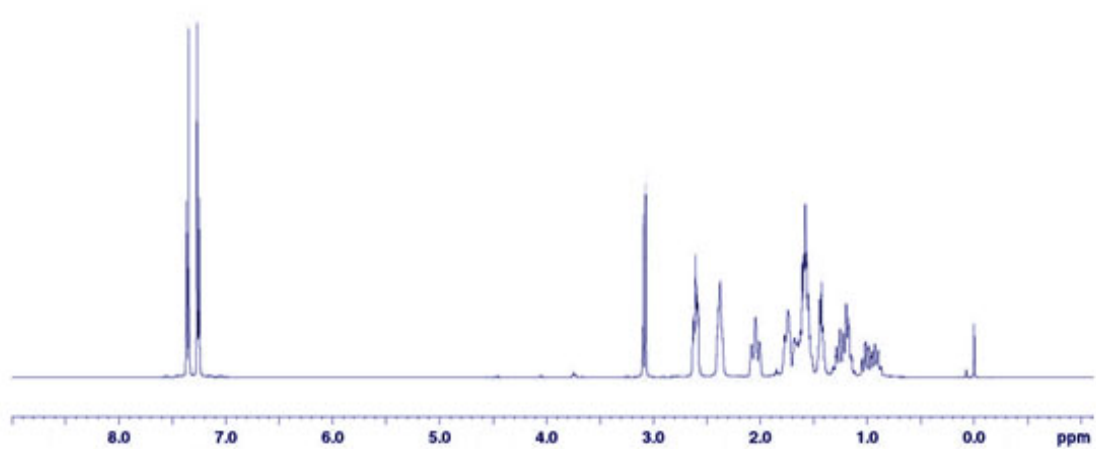

Fig. S7. <sup>1</sup>H NMR of 1-(3-(4-chlorophenyl)-1-cyclohexylprop-2-ynyl)piperidine (6a)



8a

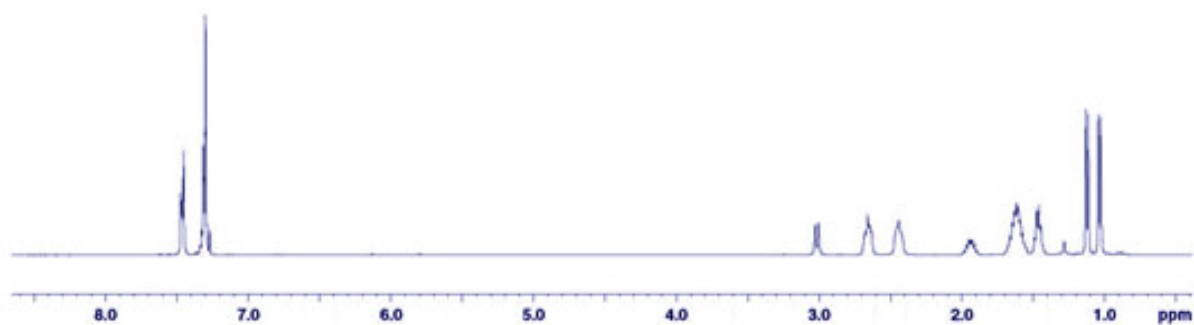

Fig. S8. <sup>1</sup>H NMR of *N*-(1-Isopropyl-3-phenyl-2-propynyl)piperidine (8a)

9a

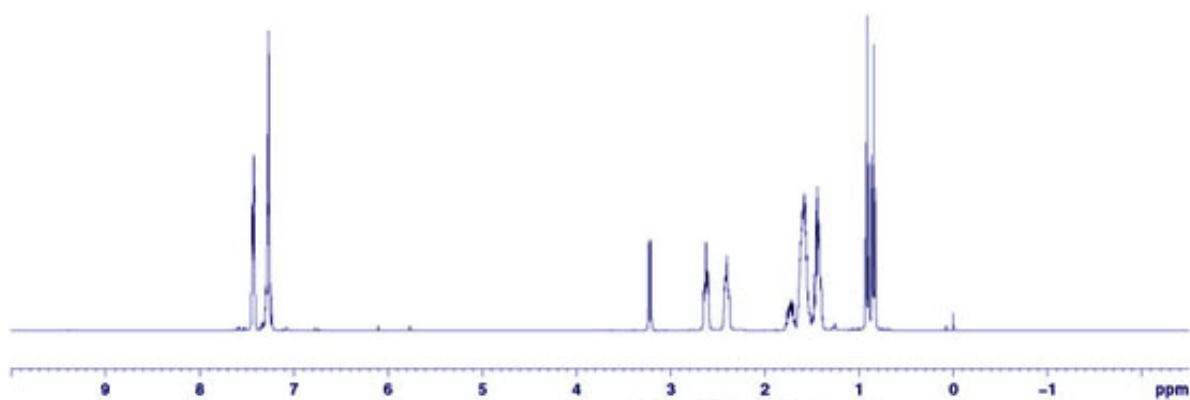

Fig. S9. <sup>1</sup>H NMR of 1-[1-(1-Ethylpropyl)-3-phenyl-2-propynyl]piperidine (9a)

10a

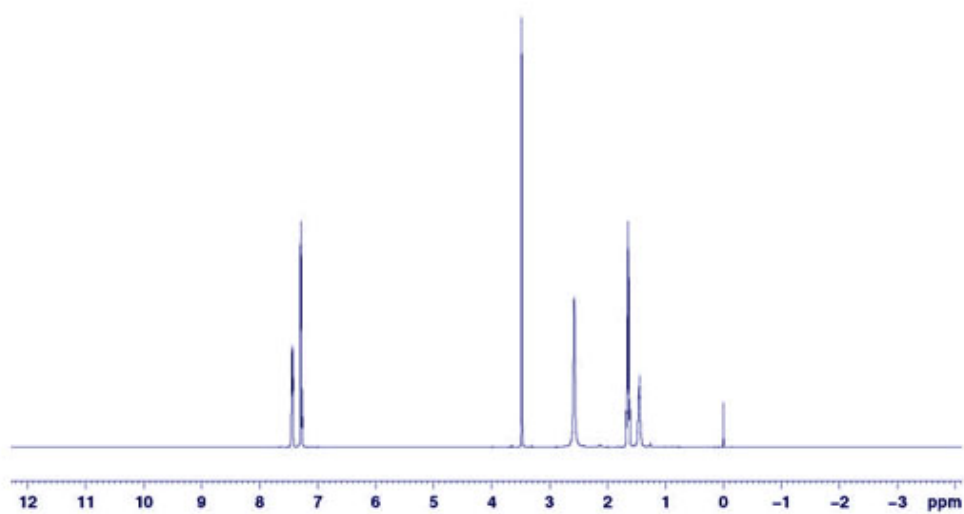

Fig. S10. <sup>1</sup>H NMR of *N*-(3-Phenyl)prop-2-ynylpiperidine (10a)

11a

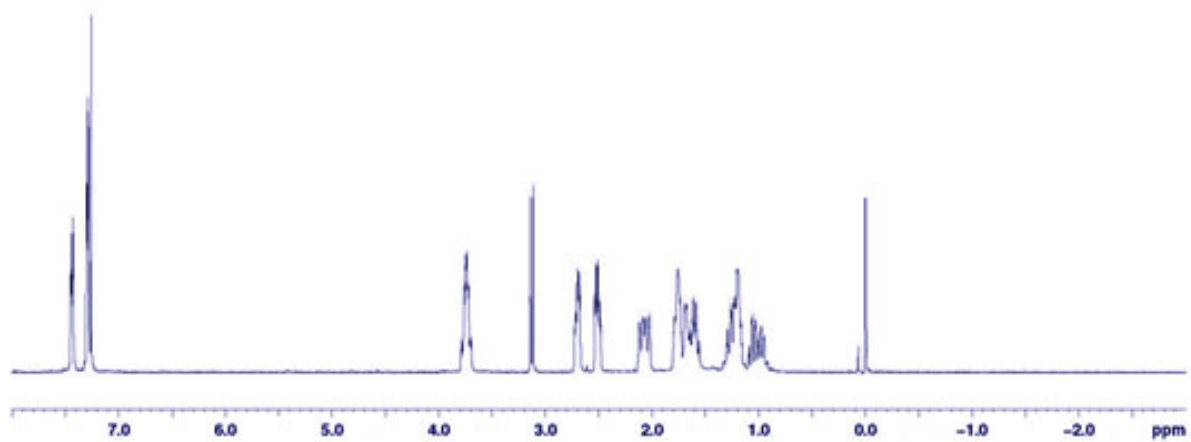

Fig. S11.  $^1\text{H}$  NMR of *N*-(1-Isopropyl-3-phenyl-2-propynyl)morpholine (11a)

12a

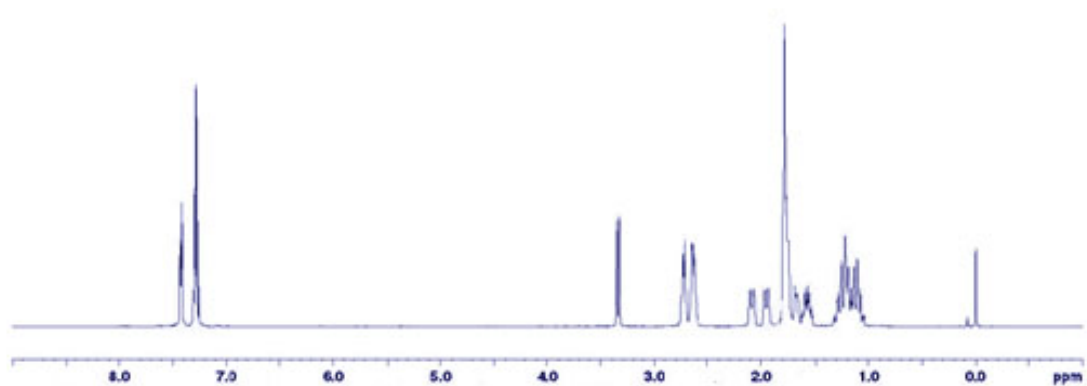

Fig. S12.  $^1\text{H}$  NMR of 1-[1-Cyclohexyl-3-(4-methylphenyl)-2-propynyl]pyrrodine (12a)

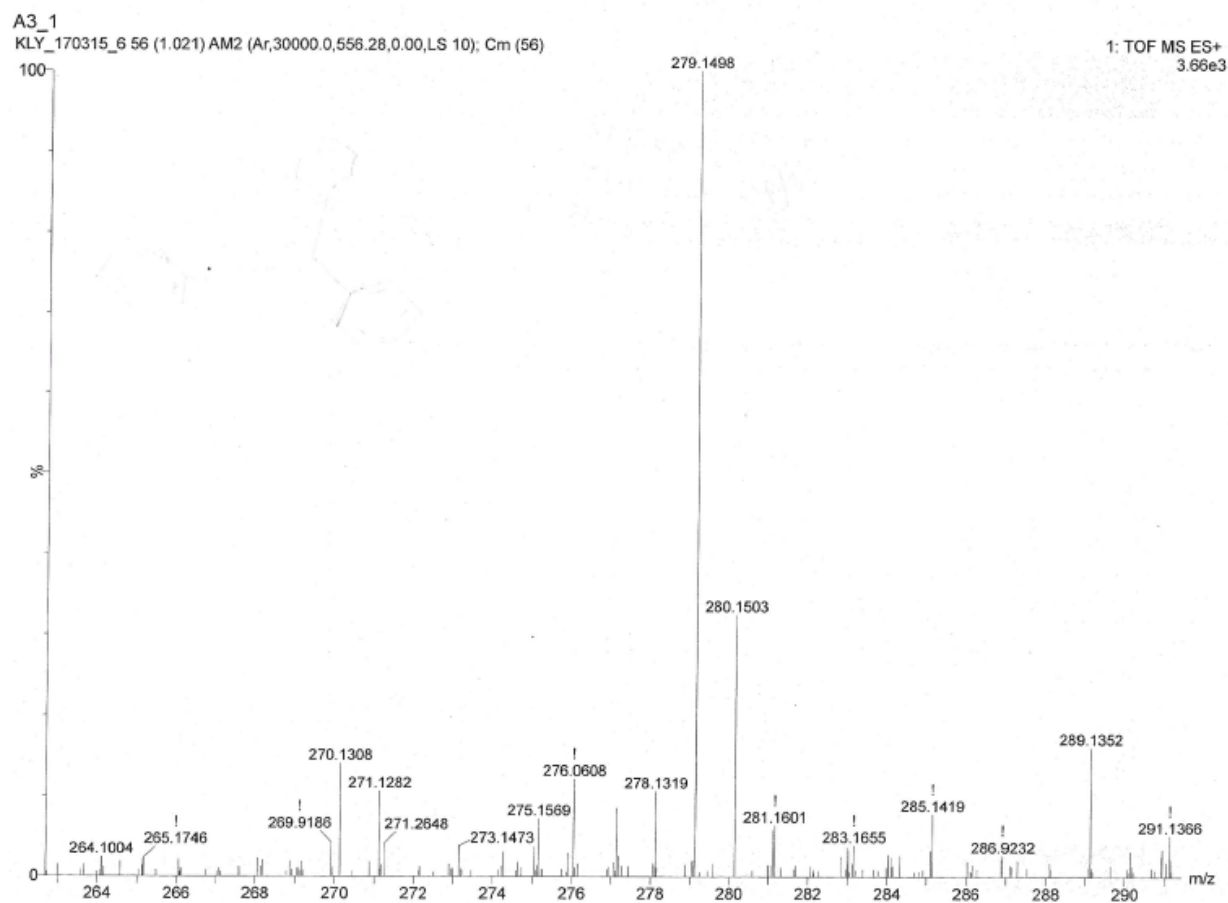

Fig. S13. Mass spectrum of 4-(1-phenyl-3-(pyridine-2-yl) prop-2-ynyl) morpholine (13a)

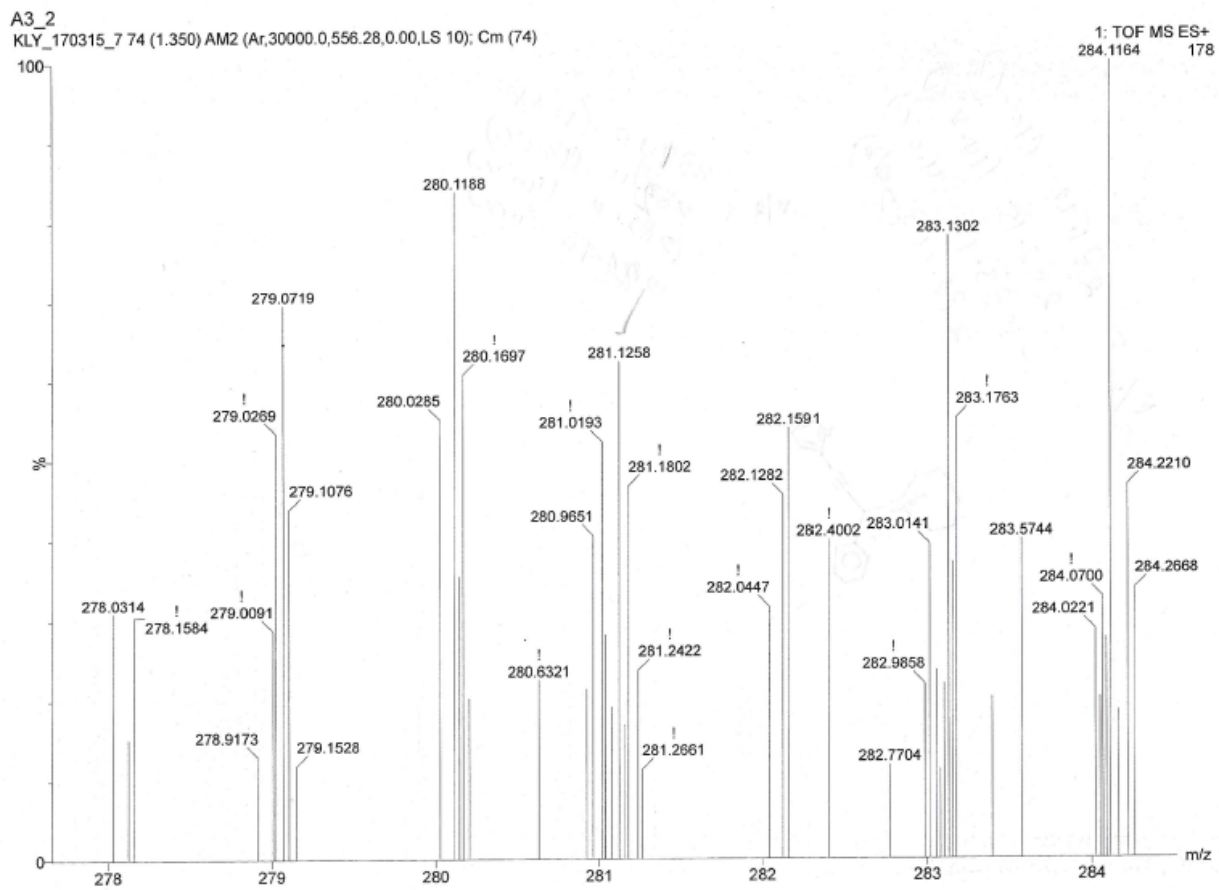

Fig. S14. Mass spectrum of 1-(1-phenyl-3-(thiophen-2-yl) prop-2-ynyl) piperidine (14a)
